# Supplementary material for: Production of 5-hydroxymethylfurfural from agarose by using a solid acid catalyst in dimethyl sulfoxide
Source: Royal Society of Chemistry journal article supplement (doi:10.1039/c5ra02911b), 2015-01-01
Supplement: c5ra02911b1.pdf [file c5ra02911b1.pdf]

<Supplementary Information>

## **Production of 5-hydroxymethylfurfural from agarose by using solid acid catalyst in dimethyl sulfoxide**

**Sang Jin Oh<sup>a</sup>, Juyi Park<sup>a</sup>, Jeong Geol Na<sup>b</sup>, You Kwan Oh<sup>b</sup>, Yong Keun Chang<sup>a,\*</sup>**

1. Representative HPLC chromatograms used for quantification of agarose hydrolysis

:Each (1) 5-HMF, (2) Galactose and (3) LA and FA analysis was performed by individual HPLC columns and detectors. More detail descriptions about analysis conditions were referred on “2.5. Analytical procedures” section in the article.

(1) 5-HMF

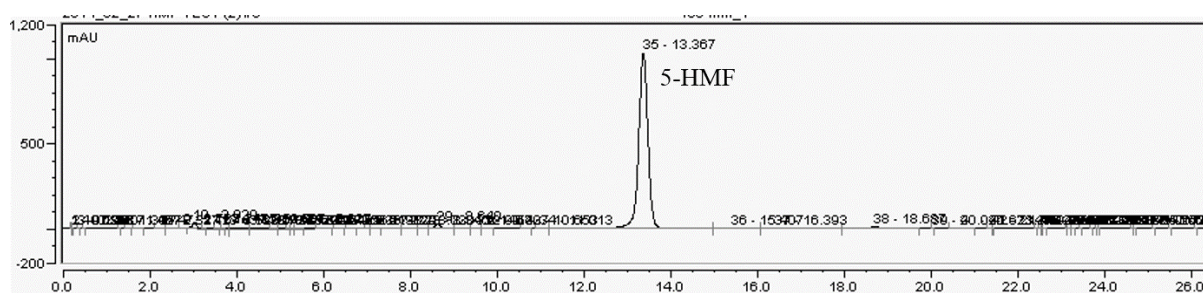

## (2) Galactose and other chemical compounds from hydrolysis

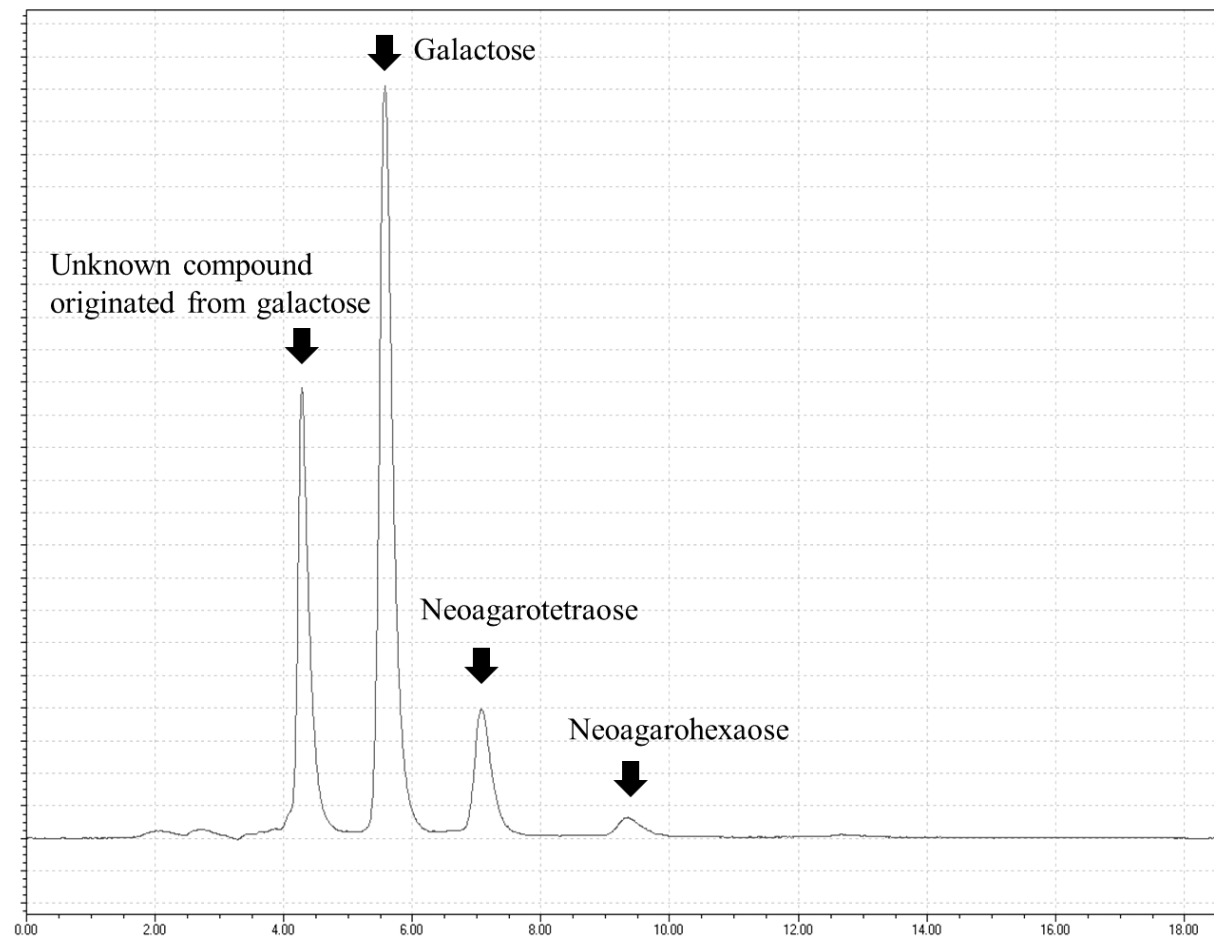

## (3) LA and FA

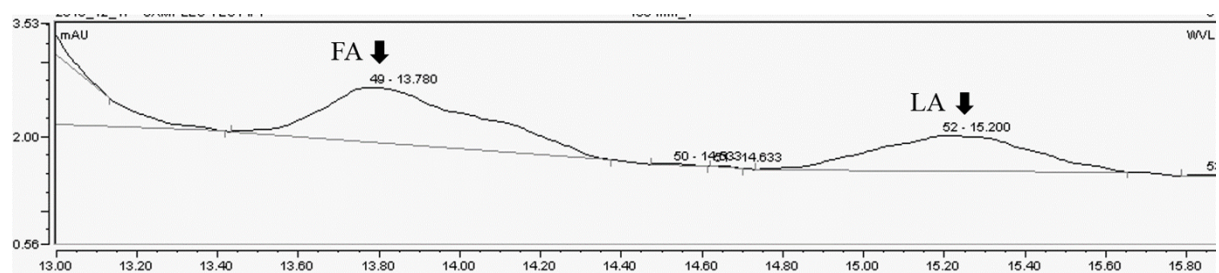

## 2. Data tables about graphical figures in the article

**Fig.3** Galactose, 5-HMF, levulinic acid and formic acid formation from agarose

(a) In aqueous solution

| Time (min) | Yield (%) |       |    |    |
|------------|-----------|-------|----|----|
|            | Galactose | 5-HMF | LA | FA |
| 0          | 0         | 0     | 0  | 0  |
| 30         | 20        | 3     | 0  | 3  |
| 40         | 49        | 13    | 9  | 7  |
| 60         | 64        | 17    | 17 | 12 |
| 90         | 80        | 13    | 30 | 24 |
| 150        | 80        | 3     | 35 | 35 |
| 210        | 78        | 1     | 50 | 49 |

(b) In DMSO

| Time (min) | Yield (%) |       |    |    |
|------------|-----------|-------|----|----|
|            | Galactose | 5-HMF | LA | FA |
| 0          | 0         | 0     | 0  | 0  |
| 30         | 21        | 9     | 1  | 5  |
| 60         | 29        | 27    | 2  | 5  |
| 120        | 31        | 44    | 6  | 7  |
| 180        | 29        | 49    | 8  | 10 |

**Fig.6** 5-HMF and levulinic acid yields at various levels of moisture content

| Moisture content<br>% (w/w) | Final yield (%) |    |
|-----------------------------|-----------------|----|
|                             | 5-HMF           | LA |
| 1.8                         | 42              | 9  |
| 3.6                         | 49              | 9  |
| 5.4                         | 55              | 10 |
| 7.2                         | 62              | 11 |
| 9.0                         | 61              | 12 |
| 10.8                        | 59              | 9  |
| 12.6                        | 58              | 10 |
| 100                         | 17              | 50 |

**Fig.8** Comparison of 5-HMF yields in beaker and packed-bed reactor

| Moisture content<br>% (w/w) | Final yield (%)    |        |
|-----------------------------|--------------------|--------|
|                             | Packed-bed reactor | Beaker |
| 3.6                         | 45                 | 49     |
| 5.4                         | 49                 | 55     |
| 7.2                         | 53                 | 62     |
| 9.0                         | 51                 | 61     |
| 10.8                        | 48                 | 59     |

**Fig.9** Results of reusability test in packed-bed reactor

|                 | 1 <sup>st</sup> run | 2 <sup>nd</sup> run | 3 <sup>rd</sup> run | 4 <sup>th</sup> run | 5 <sup>th</sup> run | 6 <sup>th</sup> run |
|-----------------|---------------------|---------------------|---------------------|---------------------|---------------------|---------------------|
| 5-HMF yield (%) | 54                  | 41                  | 37                  | 34                  | 34                  | 33                  |

3. The photo of actual packed bed differential recycle reactor

**Reservoir**

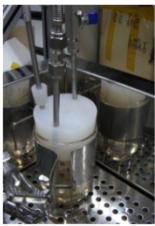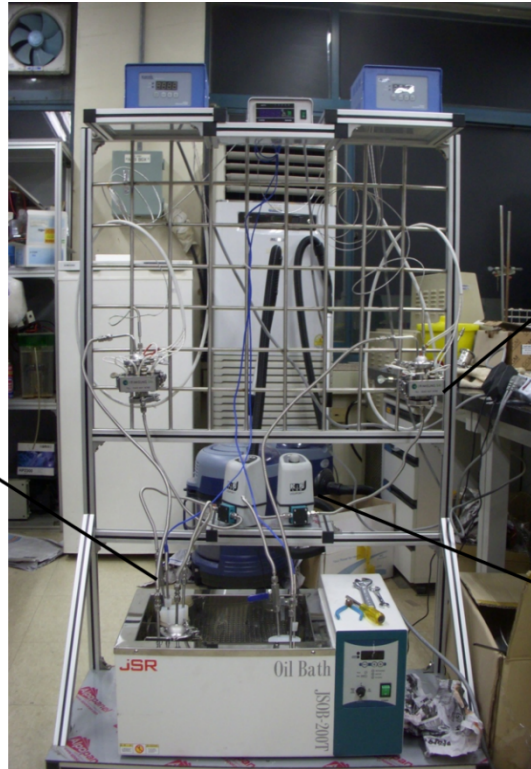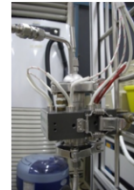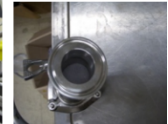

**Catalyst bed  
column**

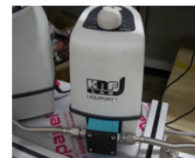

**Pump**
